# Supplementary material for: The role of car tyres in the ecology of Aedes aegypti mosquitoes in Ghana
Source: PubMed Central journal article supplement (PMC11091510; doi:10.1016/j.crpvbd.2024.100176), 2024-04-30
Supplement: mmc1.pdf [file mmc1.pdf]

**Supplementary Table S1.** Generalized linear models of the influence of temperature, humidity and replication on larval abundance of *Aedes aegypti* in the oviposition experiments.

| Larval abundance         | Effect            | Estimate $\pm$ SE     | Z-value | Pr > z |
|--------------------------|-------------------|-----------------------|---------|--------|
|                          | Intercept         | 3029.99 $\pm$ 705.02  | 4.29    | 0.001  |
| <b>All habitat types</b> | Temperature       | -56.30 $\pm$ 17.83    | -3.16   | 0.002* |
|                          | Relative humidity | -15.96 $\pm$ 3.33     | -4.80   | 0.001* |
|                          | Replicates        | -8.40 $\pm$ 11.80     | -0.71   | 0.477  |
| <b>Tyres</b>             | Intercept         | 5255.33 $\pm$ 1997.48 | 2.64    | 0.009  |
|                          | Temperature       | -214.80 $\pm$ 96.55   | -2.22   | 0.026* |
|                          | Relative humidity | -13.40 $\pm$ 11.84    | 1.13    | 0.258  |
|                          | Replicates        | -46.250 $\pm$ 27.174  | -1.7    | 0.089  |
| <b>Bowls</b>             | Intercept         | 1896.89 $\pm$ 963.97  | 1.97    | 0.049  |
|                          | Temperature       | -63.238 $\pm$ 46.59   | -1.36   | 0.175  |
|                          | Relative humidity | -1.22 $\pm$ 5.71      | -0.21   | 0.831  |
|                          | Replicates        | 17.50 $\pm$ 13.11     | 1.33    | 0.182  |
| <b>Drums</b>             | Intercept         | 3592.89 $\pm$ 1052.91 | 3.41    | 0.001  |
|                          | Temperature       | -121.700 $\pm$ 50.89  | -2.39   | 0.017* |
|                          | Relative humidity | -0.929 $\pm$ 6.24     | -0.15   | 0.880  |
|                          | Replicates        | 7.37 $\pm$ 14.32      | 0.51    | 0.610  |

\*Significant at  $P < 0.05$

**Supplementary Table S2.** Generalized linear models of the influence of temperature, humidity and replication on larval life-table parameters of *Aedes aegypti*.

| <b>Larval life-table parameters</b> | <b>Effect</b>     | <b>Estimate ± SE</b> | <b>Z-value</b> | <b>Pr &gt; z</b> |
|-------------------------------------|-------------------|----------------------|----------------|------------------|
| <b>Development time</b>             | Intercept         | 17.29 ± 31.15        | 0.55           | 0.579            |
|                                     | Temperature       | 0.046 ± 0.60         | 0.07           | 0.939            |
|                                     | Relative humidity | -0.12 ± 0.38         | -0.31          | 0.755            |
|                                     | Replicates        | 0.23 ± 1.00          | 0.23           | 0.817            |
| <b>Pupation rate</b>                | Intercept         | 4.88 ± 2.85          | 1.71           | 0.087            |
|                                     | Temperature       | -0.09 ± 0.05         | -1.81          | 0.070            |
|                                     | Relative humidity | -0.02 ± 0.04         | -0.59          | 0.553            |
|                                     | Replicates        | -0.05 ± 0.08         | 0.63           | 0.531            |
| <b>Survival rate</b>                | Intercept         | 127.85 ± 321.81      | 0.39           | 0.691            |
|                                     | Temperature       | -8.30 ± 6.29         | -1.32          | 0.187            |
|                                     | Relative humidity | 1.71 ± 3.94          | 0.43           | 0.664            |
|                                     | Replicates        | 3.31 ± 10.51         | 0.31           | 0.753            |
| <b>Emergence rate</b>               | Intercept         | -0.39 ± 1.44         | -0.27          | 0.785            |
|                                     | Temperature       | 0.005 ± 0.03         | 0.16           | 0.871            |
|                                     | Relative humidity | 0.015 ± 0.02         | 0.85           | 0.397            |
|                                     | Replicates        | -0.08 ± 0.05         | -1.37          | 0.169            |
